EDITORIAL I

Remifentanyl—an opioid for the 21st century

Remifentanyl is a fentanyl derivative with an ester linkage (3-[4-methoxycarbonyl-4-[(1-oxopropyl)phenylamino]-1-piperidine] propanoic acid, methyl ester). It is a pure  $\mu$  agonist [1] and the rapid breakdown of the ester linkage by non-specific tissue and plasma esterases is responsible for its unique characteristics. Considerable work is underway investigating this new opioid but, as yet, few data are available in the literature. However, these data enable an initial assessment of the properties of remifentanyl and its potential use in anaesthesia.

The speed of onset of action of remifentanyl is similar to that of alfentanil [2]. In patients undergoing elective inpatient surgery, the volume of distribution at steady state was 25–40 litre, total clearance 4.2–5 litre  $\text{min}^{-1}$  and terminal  $T_{1/2}$  10–21 min. Clearance was not affected significantly by body weight, sex or age [3], and it is likely to be independent of renal or hepatic function [4–6]. Furthermore, remifentanyl is a poor substrate for butyrylcholinesterases (pseudocholinesterases) *in vitro* and clearance should be unaffected by cholinesterase deficiency or administration of anticholinesterases [data on file, Glaxo].

The main metabolic product of ester hydrolysis is a carboxylic acid derivative (GI90291) which is excreted by the kidneys (elimination half-life 88–137 min [3]). Although elimination of GI90291 is delayed in renal failure [6], significant pharmacological effects are unlikely as its potency relative to remifentanyl is only 0.1–0.3 %.

At present, remifentanyl is formulated in glycine, an inhibitory neurotransmitter. Consequently, spinal or extradural administration is not recommended and there are no data on administration of remifentanyl by these routes.

Rapid biotransformation to minimally active metabolites should be associated with a short, predictable duration of action with no accumulation of effect on repeated dosing or with continuous infusion. The available data suggest that remifentanyl behaves in this way. Because of its pharmacokinetics, similar properties were expected of alfentanil [7]. However, clinical experience has shown that prolonged infusion of alfentanil may be associated with prolonged recovery time. It is now appreciated that the offset of clinical effect is not simply a function of the half-life, particularly in multicompartmental systems. It may be affected by rate of equilibration between plasma and effector site, method of administration (e.g. continuous infusion, intermittent boluses) and duration of infusion [8, 9]. Hughes,

Glass and Jacobs [10] proposed the use of context-sensitive half-time ( $T_{1/2\text{context}}$ ) and defined this as the time for the plasma concentration to decrease by 50 % after terminating an i.v. infusion designed to maintain a constant plasma concentration. Context refers to duration of infusion. They demonstrated that context-sensitive half-times of commonly used i.v. anaesthetic agents and opioids could differ markedly from elimination half-lives and were dependent on duration of infusion.

In contrast, because of the unique metabolism of remifentanyl, its  $T_{1/2\text{context}}$  should be rapid and relatively independent of the duration of infusion. This has been confirmed by *in vivo* studies. Remifentanyl  $T_{1/2\text{context}}$  was 3.1 min after a 3-h infusion (at a rate sufficient to depress minute ventilation by 40–70 %) with a time to pharmacodynamic recovery, as determined by minute ventilation, of 5.8 min. In comparison, the times for alfentanil were 44 and 34.2 min, respectively [11]. In another study, remifentanyl and alfentanil were infused i.v. at rates of 0.05  $\mu\text{g kg}^{-1} \text{min}^{-1}$  and 0.5  $\mu\text{g kg}^{-1} \text{min}^{-1}$ , respectively, for 4 h. These infusion rates resulted in a similar degree of respiratory depression. On termination of the infusions, ventilation recovered in 8 min after remifentanyl and 61 min after alfentanil [12].

It has been confirmed that the effects of remifentanyl are antagonized by naloxone [13]. Its potency is similar to that of fentanyl, and 15–30 times that of alfentanil [14, 15]. The effects of remifentanyl on arterial pressure and heart rate after bolus administration of various doses of remifentanyl (2–30  $\mu\text{g kg}^{-1}$ ) have been investigated 10 min after induction of anaesthesia with etomidate and midazolam and maintenance with nitrous oxide–isoflurane–vecuronium [16]. Mean reductions in arterial pressure and heart rate in excess of 20 % were found, the effects being unrelated to dose. I.v. administration of remifentanyl resulting in hypotension was not associated with histamine release. More detailed haemodynamic investigations are awaited, as are comparisons with other opioids.

The EEG effects of remifentanyl are similar to those of other opioids in humans [17] and dogs [18]. Remifentanyl infusion is associated with an age-related reduction in the MAC of isoflurane in humans [19]. For example, at age 40 yr, MAC was reduced by 50 % at a target remifentanyl plasma concentration of 1.2  $\text{ng ml}^{-1}$ . The effect was more marked in older patients. A ceiling effect was observed at 32  $\text{ng ml}^{-1}$  and MAC was not reduced to zero.

Inevitably, nausea and vomiting may be consequences of remifentanyl administration. However, because of its rapid clearance, the incidence of these side effects may prove to be less compared with other opioids in some situations. For example, in patients undergoing unilateral eye surgery under local anaesthesia and i.v. fentanyl or remifentanyl, the incidence of nausea after surgery in the recovery room was 54 % and 8 %, respectively [20]. However, it is necessary for these provisional data to be confirmed in larger studies.

The characteristics of a remifentanyl–nitrous oxide anaesthetic technique have been reported in the US literature [21–23]. Haemodynamic stability and rapid recovery were described. However, such techniques, without the use of an i.v. or volatile anaesthetic drug, are unlikely to gain widespread acceptance in the UK because of concerns regarding awareness. Studies are underway investigating the use of remifentanyl infusions with propofol or volatile anaesthesia but few data are available at present.

Rapid i.v. infusion of large doses of potent opioids are associated with an incidence of muscle rigidity and remifentanyl is no exception. In a comparative study of remifentanyl  $1\text{-}\mu\text{g kg}^{-1}$  bolus followed by  $0.5\text{ }\mu\text{g kg}^{-1}\text{ min}^{-1}$  and alfentanil  $25\text{-}\mu\text{g kg}^{-1}$  bolus followed by  $1\text{ }\mu\text{g kg}^{-1}\text{ min}^{-1}$ , the incidence of muscle rigidity was 8 % and 5 %, respectively [data on file, Glaxo]. The majority of cases were described as mild or moderate (i.e. manual ventilation was still possible). As with other opioids, the incidence and severity are dependent on dose and rate of administration.

Based on the evidence so far presented, it may be that remifentanyl will be used widely because of its predictability and easily reversible effects. However, its use also presents the anaesthetist with a significant challenge. If remifentanyl is the only opioid administered during anaesthesia, it must be remembered that shortly after the end of the procedure, the patient will not benefit from opioid-based analgesia. This problem must be addressed if remifentanyl is to be used for procedures associated with significant postoperative pain. Such techniques may include reducing the infusion rate of remifentanyl to analgesic doses (which should be relatively simple), immediate administration of longer acting opioids as the effects of remifentanyl begin to fade and increased awareness of the possibilities of local anaesthesia.

Such a short-acting and predictable opioid has not been available before to anaesthetists and it is difficult to predict precisely where its niche will lie. However, it has numerous potential applications ranging from short stimulating procedures to prolonged infusions where rapid recovery is required. Possibilities abound, not only in anaesthesia but in intensive care medicine. Overall, it represents a unique alternative to the currently available opioids and the results of further studies are awaited with interest.

J. P. THOMPSON  
D. J. ROWBOTHAM

University Department of Anaesthesia  
Leicester Royal Infirmary  
Leicester LE1 5WW

## References

- James MK, Feldman PL, Schuster SV. Opioid receptor activity of GI87084B, a novel ultra-short acting analgesic in isolated tissues. *Journal of Pharmacology and Experimental Therapeutics* 1991; **259**: 712–718.
- Glass PSA, Hardman D, Kamiyama Y, Quill TJ, Marton G, Donn KH, Grosse CM, Hermann D. Preliminary pharmacokinetics and pharmacodynamics of an ultra-short acting opioid remifentanyl (GI87084B). *Anesthesia and Analgesia* 1993; **77**: 1031–1040.
- Westmoreland CL, Hoke JF, Sebel PS, Hug CH, Muir KT. Pharmacokinetics of remifentanyl (GI87084B) and its major metabolite (GI90291) in patients undergoing elective inpatient surgery. *Anesthesiology* 1993; **79**: 893–903.
- Dershwitz M, Rosow CE, Michalowski P, Connors PM, Hoke JF, Muir KT, Dienstag JL. Pharmacokinetics and pharmacodynamics of remifentanyl in volunteer subjects with severe liver disease compared with normal subjects. *Anesthesiology* 1994; **81**: A377.
- Shlugman D, Dufore S, Dershwitz M, Michalowski P, Hoke J, Muir KT, Rosow C, Glass PSA. Respiratory effects of remifentanyl in subjects with severe renal impairment compared to matched controls. *Anesthesiology* 1994; **81**: A1417.
- Hoke JF, Muir KT, Glass PSA, Shlugman D, Rosow CE, Dershwitz M, Michalowski P. Pharmacokinetics of remifentanyl and its metabolite (GR90291) in subjects with renal disease. *Clinical Pharmacology and Therapeutics* 1995; **PI**: 55.
- Stanski DR, Hug CC. Alfentanil—a kinetically predictable narcotic analgesic. *Anesthesiology* 1982; **57**: 435–438.
- Shafer SL, Varvel JR. Pharmacokinetics, pharmacodynamics, and rational opioid selection. *Anesthesiology* 1991; **74**: 53–63.
- Shafer SL, Stanski DR. Improving the clinical utility of anesthetic drug pharmacokinetics. *Anesthesiology* 1992; **76**: 327–330.
- Hughes MA, Glass PSA, Jacobs JR. Context-sensitive half-time in multicompartment pharmacokinetic models for intravenous anesthetic drugs. *Anesthesiology* 1992; **76**: 334–341.
- Kapila A, Muir KT, Hermann DJ, Shiraishi M, Leonard MD, Glass PSA. Measured context sensitive half times of remifentanyl and alfentanil. *Anesthesiology* 1993; **79**: A377.
- Glass PSA. Pharmacodynamic comparison of GI87084B, a novel ultra-short acting opioid, and alfentanil. *Anesthesia and Analgesia* 1992; **74**: S113.
- Amin HM, Sopchak AM, Esposito RN, Graham CL, Batenhorst RL, Camporesi EM. Naloxone reversal of depressed ventilatory response to hypoxia during continuous infusion of remifentanyl. *Anesthesiology* 1993; **79**: A1203.
- Marton JP, Hardmann HD, Kamiyama Y, Donn KH, Glass PSA. Analgesic efficacy of single escalating doses of GI87084B administered intravenously to healthy adult male volunteers. *Anesthesiology* 1991; **75**: A378.
- Joshi P, Jhaveri R, Bauman V, McNeal S, Batenhorst RL, Glass PSA. Comparative trial of remifentanyl and alfentanil for anesthesia induction. *Anesthesiology* 1993; **79**: A379.
- Sebel PS, Hoke JF, Westmoreland C, Hug CC, Muir KT, Szlam F. Histamine concentrations and haemodynamic responses after remifentanyl. *Anesthesia and Analgesia* 1995; **80**: 990–993.
- Egan TD, Minto C, Lemmens HJM, Muir KT, Hermann DJ, Shafer SL. Remifentanyl versus alfentanil: comparative pharmacodynamics. *Anesthesiology* 1994; **81**: A374.
- Hoffman WE, Cunningham F, James MK, Baughman VL, Albrecht RF. Effects of remifentanyl, a new short-acting opioid, on cerebral flow, brain electrical activity, and intracranial pressure in dogs anesthetized with isoflurane and nitrous oxide. *Anesthesiology* 1993; **79**: 107–113.
- Kapila A, Lang E, Glass P, Sebel P, Shlugman D, Hill A, Wood M, Batenhorst R, Goodman D. MAC reduction of isoflurane by remifentanyl. *Anesthesiology* 1994; **81**: A378.
- Sung YF, Stulting RD, Beatie CD, Stead S, Jamerson BD. Intraocular pressure effects of remifentanyl (GI87084B) and alfentanil. *Anesthesiology* 1994; **81**: A36.
- Kallar SK, Wetchler BV, Shaw DL, Jamerson B. A single blind, comparative study of the safety and efficacy and remifentanyl and alfentanil for outpatient anesthesia. *Anesthesiology* 1994; **81**: A32.

22. Dershwitz M, Randel G, Rosow CE, Fragen R, DiBiase PM, Librojo ES, Jamerson B, Shaw DL, Batenhorst R. Dose-response relationship of GI87084B, a new ultra-short acting opioid. *Anesthesiology* 1992; 77: A396.
23. Monk TG, Batenhorst RL, Folger WH, Kirkham AJT, Lemon DJ, Martin KJ, Venker DC. A comparison of remifentanyl and alfentanil during nitrous-narcotic anesthesia. *Anesthesia and Analgesia* 1994; 78: S293.
